# Supplementary material for: Marine algal flora of Flores and Corvo Islands, Azores
Source: Biodivers Data J. 2021 Feb 3;9:e60929. doi: 10.3897/BDJ.9.e60929 (PMC7875959; doi:10.3897/BDJ.9.e60929)
Supplement: Supplementary material 1 — DP-FLOR+COR-id_15074_normalized.csv [file bdj-09-e60929-s001.csv]

occurrenceId	verbatimScientificName	scientificName	key	matchType	confidence	status	rank	kingdom	phylum	class	order	family	genus	species
,"Acrosorium ciliolatum (Harvey) Kylin","Acrosorium ciliolatum (Harv.) Kylin","2662395","EXACT","100","ACCEPTED","SPECIES","Plantae","Rhodophyta","Florideophyceae","Ceramiales","Delesseriaceae","Acrosorium","Acrosorium ciliolatum"
,"Amphiroa beauvoisii J.V.Lamouroux","Amphiroa beauvoisii J.V.Lamour.","5276511","EXACT","100","ACCEPTED","SPECIES","Plantae","Rhodophyta","Florideophyceae","Corallinales","Corallinaceae","Amphiroa","Amphiroa beauvoisii"
,"Amphiroa rigida J.V.Lamouroux","Amphiroa rigida J.V.Lamour.","5276551","EXACT","100","ACCEPTED","SPECIES","Plantae","Rhodophyta","Florideophyceae","Corallinales","Corallinaceae","Amphiroa","Amphiroa rigida"
,"Anadyomene stellata (Wulfen) C.Agardh","Anadyomene stellata (Wulfen) C.Agardh","5272960","EXACT","100","SYNONYM","SPECIES","Plantae","Chlorophyta","Ulvophyceae","Cladophorales","Anadyomenaceae","Anadyomene","Anadyomene stellata"
,"Ascophyllum nodosum (Linnaeus) Le Jolis","Ascophyllum nodosum (L.) Le Jol.","3196524","EXACT","100","ACCEPTED","SPECIES","Chromista","Ochrophyta","Phaeophyceae","Fucales","Fucaceae","Ascophyllum","Ascophyllum nodosum"
,"Asparagopsis armata Harvey","Asparagopsis armata Harv.","5279840","EXACT","100","ACCEPTED","SPECIES","Plantae","Rhodophyta","Florideophyceae","Bonnemaisoniales","Bonnemaisoniaceae","Asparagopsis","Asparagopsis armata"
,"Asparagopsis taxiformis (Delile) Trevisan","Asparagopsis taxiformis (Delile) Trevis.","5279834","EXACT","100","ACCEPTED","SPECIES","Plantae","Rhodophyta","Florideophyceae","Bonnemaisoniales","Bonnemaisoniaceae","Asparagopsis","Asparagopsis taxiformis"
,"Bornetia secundiflora (J.Agardh) Thuret","Bornetia secundiflora (J.Agardh) Thur., 1855","2658705","EXACT","100","ACCEPTED","SPECIES","Plantae","Rhodophyta","Florideophyceae","Ceramiales","Ceramiaceae","Bornetia","Bornetia secundiflora"
,"Botryocladia botryoides (Wulfen) Feldmann","Botryocladia botryoides (Wulfen) Feldmann","2663201","EXACT","100","DOUBTFUL","SPECIES","Plantae","Rhodophyta","Florideophyceae","Rhodymeniales","Rhodymeniaceae","Chrysymenia","Botryocladia botryoides"
,"Bryopsis cupressina J.V.Lamouroux","Bryopsis cupressina J.V.Lamour., 1809","5272002","EXACT","100","ACCEPTED","SPECIES","Plantae","Chlorophyta","Ulvophyceae","Bryopsidales","Bryopsidaceae","Bryopsis","Bryopsis cupressina"
,"Bryopsis hypnoides J.V.Lamouroux","Bryopsis hypnoides J.V.Lamour.","5272051","EXACT","100","ACCEPTED","SPECIES","Plantae","Chlorophyta","Ulvophyceae","Bryopsidales","Bryopsidaceae","Bryopsis","Bryopsis hypnoides"
,"Bryopsis pennata J.V.Lamouroux","Bryopsis pennata J.V.Lamour.","5272060","EXACT","100","ACCEPTED","SPECIES","Plantae","Chlorophyta","Ulvophyceae","Bryopsidales","Bryopsidaceae","Bryopsis","Bryopsis pennata"
,"Bryopsis plumosa (Hudson) C. Agardh","Bryopsis plumosa (Hudson) C.Agardh","5272029","EXACT","100","ACCEPTED","SPECIES","Plantae","Chlorophyta","Ulvophyceae","Bryopsidales","Bryopsidaceae","Bryopsis","Bryopsis plumosa"
,"Callithamnion corymbosum (J.E.Smith) Lyngbye","Callithamnion corymbosum (J.E.Smith) Lyngbye","2658582","EXACT","100","ACCEPTED","SPECIES","Plantae","Rhodophyta","Florideophyceae","Ceramiales","Callithamniaceae","Callithamnion","Callithamnion corymbosum"
,"Callithamnion granulatum (Ducluzeau) C.Agardh","Callithamnion granulatum (Ducluz.) C.Agardh","2658548","EXACT","100","ACCEPTED","SPECIES","Plantae","Rhodophyta","Florideophyceae","Ceramiales","Callithamniaceae","Callithamnion","Callithamnion granulatum"
,"Carpomitra costata (Stackhouse) Batters","Carpomitra costata (Stackh.) Batters","3196229","EXACT","100","ACCEPTED","SPECIES","Chromista","Ochrophyta","Phaeophyceae","Sporochnales","Sporochnaceae","Carpomitra","Carpomitra costata"
,"Carradoriella denudata (Dillwyn) A.M.Savoie & G.W.Saunders","Carradoriella P.C.Silva, 1996","2659269","HIGHERRANK","96","SYNONYM","GENUS","Plantae","Rhodophyta","Florideophyceae","Ceramiales","Rhodomelaceae","Polysiphonia",
,"Caulacanthus ustulatus (Mertens ex Turner) Kutzing","Caulacanthus ustulatus (Mertens ex Turner) Kütz., 1843","2666536","EXACT","100","ACCEPTED","SPECIES","Plantae","Rhodophyta","Florideophyceae","Gigartinales","Caulacanthaceae","Caulacanthus","Caulacanthus ustulatus"
,"Centroceras clavulatum (C.Agardh) Montagne","Centroceras clavulatum (C.Agardh) Mont.","5276780","EXACT","100","ACCEPTED","SPECIES","Plantae","Rhodophyta","Florideophyceae","Ceramiales","Ceramiaceae","Centroceras","Centroceras clavulatum"
,"Ceramium ciliatum (J.Ellis) Ducluzeau","Ceramium ciliatum (J.Ellis) Ducluz.","5276853","EXACT","100","SYNONYM","SPECIES","Plantae","Rhodophyta","Florideophyceae","Ceramiales","Ceramiaceae","Ceramium","Ceramium shuttleworthianum"
,"Ceramium cimbricum H.E.Petersen","Ceramium cimbricum H.E.Petersen","5276950","EXACT","100","ACCEPTED","SPECIES","Plantae","Rhodophyta","Florideophyceae","Ceramiales","Ceramiaceae","Ceramium","Ceramium cimbricum"
,"Ceramium derbesii Solier ex Kutzing","Ceramium derbesii Solier ex Kütz., 1847","5277047","EXACT","100","ACCEPTED","SPECIES","Plantae","Rhodophyta","Florideophyceae","Ceramiales","Ceramiaceae","Ceramium","Ceramium derbesii"
,"Ceramium echionotum J.Agardh","Ceramium echionotum J.Agardh","5276967","EXACT","100","ACCEPTED","SPECIES","Plantae","Rhodophyta","Florideophyceae","Ceramiales","Ceramiaceae","Ceramium","Ceramium echionotum"
,"Ceramium gaditanum (Clemente) Cremades","Ceramium gaditanum (Clemente) Cremades","5277120","EXACT","100","ACCEPTED","SPECIES","Plantae","Rhodophyta","Florideophyceae","Ceramiales","Ceramiaceae","Ceramium","Ceramium gaditanum"
,"Ceramium virgatum Roth","Ceramium virgatum Roth","5277079","EXACT","100","ACCEPTED","SPECIES","Plantae","Rhodophyta","Florideophyceae","Ceramiales","Ceramiaceae","Ceramium","Ceramium virgatum"
,"Ceratodictyon intricatum (C.Agardh) R.E.Norris","Ceratodictyon intricatum (C.Agardh) R.E.Norris","2663508","EXACT","100","ACCEPTED","SPECIES","Plantae","Rhodophyta","Florideophyceae","Rhodymeniales","Lomentariaceae","Ceratodictyon","Ceratodictyon intricatum"
,"Ceratodictyon scoparium (Montagne & Millardet) R.E.Norris","Ceratodictyon scoparium (Mont. & Millardet) R.E.Norris, 1987","2663517","EXACT","100","ACCEPTED","SPECIES","Plantae","Rhodophyta","Florideophyceae","Rhodymeniales","Lomentariaceae","Ceratodictyon","Ceratodictyon scoparium"
,"Chaetomorpha aerea (Dillwyn) Kutzing","Chaetomorpha aerea (Dillwyn) Kützing","2644557","EXACT","100","SYNONYM","SPECIES","Plantae","Chlorophyta","Ulvophyceae","Cladophorales","Cladophoraceae","Chaetomorpha","Chaetomorpha linum"
,"Chaetomorpha linum (O.F.Muller) Kutzing","Chaetomorpha linum (O.F.Müller) Kützing","2644592","EXACT","100","ACCEPTED","SPECIES","Plantae","Chlorophyta","Ulvophyceae","Cladophorales","Cladophoraceae","Chaetomorpha","Chaetomorpha linum"
,"Chondracanthus acicularis (Roth) Fredericq","Chondracanthus acicularis (Roth) Fredericq","5279140","EXACT","100","ACCEPTED","SPECIES","Plantae","Rhodophyta","Florideophyceae","Gigartinales","Gigartinaceae","Chondracanthus","Chondracanthus acicularis"
,"Chondracanthus teedei (Mertens ex Roth) Kutzing","Chondracanthus teedii (Roth) Kütz.","5279143","FUZZY","100","SYNONYM","SPECIES","Plantae","Rhodophyta","Florideophyceae","Gigartinales","Gigartinaceae","Chondracanthus","Chondracanthus teedei"
,"Chondria capillaris (Hudson) M.J.Wynne","Chondria capillaris (Huds.) M.J.Wynne","5279778","EXACT","100","ACCEPTED","SPECIES","Plantae","Rhodophyta","Florideophyceae","Ceramiales","Rhodomelaceae","Chondria","Chondria capillaris"
,"Chondria dasyphylla (Woodward) C.Agardh","Chondria dasyphylla (Woodward) C.Agardh","7769508","EXACT","100","ACCEPTED","SPECIES","Plantae","Rhodophyta","Florideophyceae","Ceramiales","Rhodomelaceae","Chondria","Chondria dasyphylla"
,"Cladophora albida (Nees) Kutzing","Cladophora albida (Nees) Kützing","5272397","EXACT","100","ACCEPTED","SPECIES","Plantae","Chlorophyta","Ulvophyceae","Cladophorales","Cladophoraceae","Cladophora","Cladophora albida"
,"Cladophora coelothrix Kutzing","Cladophora coelothrix Kütz.","5272740","EXACT","100","ACCEPTED","SPECIES","Plantae","Chlorophyta","Ulvophyceae","Cladophorales","Cladophoraceae","Cladophora","Cladophora coelothrix"
,"Cladophora hutchinsiae (Dillwyn) Kutzing","Cladophora hutchinsiae (Dillwyn) Kütz.","5272575","EXACT","100","ACCEPTED","SPECIES","Plantae","Chlorophyta","Ulvophyceae","Cladophorales","Cladophoraceae","Cladophora","Cladophora hutchinsiae"
,"Cladophora laetevirens (Dillwyn) Kutzing","Cladophora laetevirens (Dillwyn) Kützing","5272485","EXACT","100","ACCEPTED","SPECIES","Plantae","Chlorophyta","Ulvophyceae","Cladophorales","Cladophoraceae","Cladophora","Cladophora laetevirens"
,"Cladophora lehmanniana (Lindenberg) Kutzing","Cladophora lehmanniana (Lindenb.) Kütz.","5272598","EXACT","100","ACCEPTED","SPECIES","Plantae","Chlorophyta","Ulvophyceae","Cladophorales","Cladophoraceae","Cladophora","Cladophora lehmanniana"
,"Cladophora prolifera (Roth) Kutzing","Cladophora prolifera (Roth) Kütz.","5272619","EXACT","100","ACCEPTED","SPECIES","Plantae","Chlorophyta","Ulvophyceae","Cladophorales","Cladophoraceae","Cladophora","Cladophora prolifera"
,"Cladophoropsis membranacea (Hofman Bang ex C.Agardh) Borgesen","Cladophoropsis membranacea (Bang ex C.Agardh) Børgesen","2644890","EXACT","100","ACCEPTED","SPECIES","Plantae","Chlorophyta","Ulvophyceae","Siphonocladales","Boodleaceae","Cladophoropsis","Cladophoropsis membranacea"
,"Cladostephus spongiosus (Hudson) C.Agardh","Cladostephus spongiosus (Huds.) C.Agardh","3200756","EXACT","100","ACCEPTED","SPECIES","Chromista","Ochrophyta","Phaeophyceae","Sphacelariales","Cladostephaceae","Cladostephus","Cladostephus spongiosus"
,"Codium adhaerens C.Agardh","Codium adhaerens C.Agardh, 1822","5272156","EXACT","100","ACCEPTED","SPECIES","Plantae","Chlorophyta","Ulvophyceae","Bryopsidales","Codiaceae","Codium","Codium adhaerens"
,"Codium decorticatum (Woodward) M.A.Howe","Codium decorticatum (Woodw.) M.A.Howe","5272147","EXACT","100","ACCEPTED","SPECIES","Plantae","Chlorophyta","Ulvophyceae","Bryopsidales","Codiaceae","Codium","Codium decorticatum"
,"Codium fragile subsp. fragile (Suringar) Hariot","Codium fragile subsp. fragile","7230558","EXACT","100","ACCEPTED","SUBSPECIES","Plantae","Chlorophyta","Ulvophyceae","Bryopsidales","Codiaceae","Codium","Codium fragile"
,"Colpomenia sinuosa (Mertens ex Roth) Derbes & Solier","Colpomenia sinuosa (Mert. ex Roth) Derbès & Solier","3197958","EXACT","100","ACCEPTED","SPECIES","Chromista","Ochrophyta","Phaeophyceae","Scytosiphonales","Scytosiphonaceae","Colpomenia","Colpomenia sinuosa"
,"Corallina ferreyrae E.Y.Dawson","Corallina ferreyrai E.Y.Dawson et al.","5730171","FUZZY","95","ACCEPTED","SPECIES","Plantae","Rhodophyta","Florideophyceae","Corallinales","Corallinaceae","Corallina","Corallina ferreyrai"
,"Corallina officinalis Linnaeus","Corallina officinalis Linnaeus, 1758","5276013","EXACT","100","ACCEPTED","SPECIES","Plantae","Rhodophyta","Florideophyceae","Corallinales","Corallinaceae","Corallina","Corallina officinalis"
,"Cruoria pellita (Lyngbye) Fries","Cruoria pellita (Lyngbye) Fries","2666503","EXACT","100","ACCEPTED","SPECIES","Plantae","Rhodophyta","Florideophyceae","Gigartinales","Cruoriaceae","Cruoria","Cruoria pellita"
,"Cryptopleura ramosa (Hudson) L.Newton","Cryptopleura ramosa (Hudson) L.Newton","5278328","EXACT","100","ACCEPTED","SPECIES","Plantae","Rhodophyta","Florideophyceae","Ceramiales","Delesseriaceae","Cryptopleura","Cryptopleura ramosa"
,"Cutleria multifida (Turner) Greville","Cutleria multifida (Turner) Grev.","5422862","EXACT","100","ACCEPTED","SPECIES","Chromista","Ochrophyta","Phaeophyceae","Cutleriales","Cutleriaceae","Cutleria","Cutleria multifida"
,"Cystoseira foeniculacea (Linnaeus) Greville","Cystoseira foeniculacea (L.) Grev.","3197777","EXACT","100","ACCEPTED","SPECIES","Chromista","Ochrophyta","Phaeophyceae","Fucales","Sargassaceae","Cystoseira","Cystoseira foeniculacea"
,"Cystoseira humilis Schousboe ex Kutzing","Cystoseira humilis Schousboe ex Kütz., 1860","3197719","EXACT","100","ACCEPTED","SPECIES","Chromista","Ochrophyta","Phaeophyceae","Fucales","Sargassaceae","Cystoseira","Cystoseira humilis"
,"Derbesia marina (Lyngbye) Solier","Derbesia marina (Lyngb.) Solier","7443380","EXACT","100","ACCEPTED","SPECIES","Plantae","Chlorophyta","Ulvophyceae","Bryopsidales","Derbesiaceae","Derbesia","Derbesia marina"
,"Dictyopteris polypodioides (A.P.De Candolle) J.V.Lamouroux","Dictyopteris polypodioides (DC.) J.V.Lamour.","5423614","EXACT","100","ACCEPTED","SPECIES","Chromista","Ochrophyta","Phaeophyceae","Dictyotales","Dictyotaceae","Dictyopteris","Dictyopteris polypodioides"
,"Dictyota bartayresiana J.V.Lamouroux","Dictyota bartayresiana J.V.Lamour.","5423551","EXACT","100","ACCEPTED","SPECIES","Chromista","Ochrophyta","Phaeophyceae","Dictyotales","Dictyotaceae","Dictyota","Dictyota bartayresiana"
,"Dictyota cyanoloma Tronholm","Dictyota cyanoloma Tronholm, De Clerck, Gomez Garreta & Rull Lluch, 2010","8018048","EXACT","99","ACCEPTED","SPECIES","Chromista","Ochrophyta","Phaeophyceae","Dictyotales","Dictyotaceae","Dictyota","Dictyota cyanoloma"
,"Dictyota dichotoma (Hudson) J.V.Lamouroux","Dictyota dichotoma (Huds.) J.V.Lamour.","5423480","EXACT","100","ACCEPTED","SPECIES","Chromista","Ochrophyta","Phaeophyceae","Dictyotales","Dictyotaceae","Dictyota","Dictyota dichotoma"
,"Ellisolandia elongata (J.Ellis & Solander) K.R.Hind & G.W.Saunders","Ellisolandia elongata (J.Ellis & Sol.) K.R.Hind & G.W.Saunders","8103861","EXACT","100","ACCEPTED","SPECIES","Plantae","Rhodophyta","Florideophyceae","Corallinales","Corallinaceae","Ellisolandia","Ellisolandia elongata"
,"Ellisolandia elongata (J.Ellis & Solander) K.R.Hind & G.W.Saunders","Ellisolandia elongata (J.Ellis & Sol.) K.R.Hind & G.W.Saunders","8103861","EXACT","100","ACCEPTED","SPECIES","Plantae","Rhodophyta","Florideophyceae","Corallinales","Corallinaceae","Ellisolandia","Ellisolandia elongata"
,"Erythrocystis montagnei (Derbes & Solier) P.C.Silva","Erythrocystis montagnei (Derbès & Solier) P.C.Silva, 1952","2660013","EXACT","100","ACCEPTED","SPECIES","Plantae","Rhodophyta","Florideophyceae","Ceramiales","Rhodomelaceae","Erythrocystis","Erythrocystis montagnei"
,"Erythrodermis traillii (Holmes ex Batters) Guiry & Garbary","Erythrodermis traillii (Holmes ex Batters) Guiry & Garbary","2667281","EXACT","100","ACCEPTED","SPECIES","Plantae","Rhodophyta","Florideophyceae","Gigartinales","Phyllophoraceae","Erythrodermis","Erythrodermis traillii"
,"Gelidium corneum (Hudson) J.V.Lamouroux","Gelidium corneum (Huds.) J.V.Lamour.","2662882","EXACT","100","SYNONYM","SPECIES","Plantae","Rhodophyta","Florideophyceae","Gelidiales","Gelidiaceae","Gelidium","Gelidium spinosum"
,"Gelidium microdon Kutzing","Gelidium J.V.Lamour.","9460134","HIGHERRANK","96","ACCEPTED","GENUS","Plantae","Rhodophyta","Florideophyceae","Gelidiales","Gelidiaceae","Gelidium",
,"Gelidium pusillum (Stackhouse) Le Jolis","Gelidium pusillum (Stackh.) Le Jol.","2662756","EXACT","100","ACCEPTED","SPECIES","Plantae","Rhodophyta","Florideophyceae","Gelidiales","Gelidiaceae","Gelidium","Gelidium pusillum"
,"Gelidium spinosum (S.G.Gmelin) P.C.Silva","Gelidium spinosum (S.G.Gmelin) P.C.Silva","2662738","EXACT","100","ACCEPTED","SPECIES","Plantae","Rhodophyta","Florideophyceae","Gelidiales","Gelidiaceae","Gelidium","Gelidium spinosum"
,"Gigartina pistillata (S.G.Gmelin) Stackhouse","Gigartina pistillata (S.G.Gmel.) Stackh.","2666168","EXACT","100","ACCEPTED","SPECIES","Plantae","Rhodophyta","Florideophyceae","Gigartinales","Gigartinaceae","Gigartina","Gigartina pistillata"
,"Gracilariopsis longissima (S.G.Gmelin) Steentoft","Gracilariopsis longissima (S.G.Gmelin) M.Steentoft, L.M.Irvine & W.F.Farnham","2665870","EXACT","100","SYNONYM","SPECIES","Plantae","Rhodophyta","Florideophyceae","Gracilariales","Gracilariaceae","Gracilaria","Gracilaria longissima"
,"Grateloupia filicina (J.V.Lamouroux) C.Agardh","Grateloupia filicina (J.V.Lamour.) C.Agardh","5729905","EXACT","100","ACCEPTED","SPECIES","Plantae","Rhodophyta","Florideophyceae","Halymeniales","Halymeniaceae","Grateloupia","Grateloupia filicina"
,"Griffithsia corallinoides (Linnaeus) Trevisan","Griffithsia corallinoides (Linnaeus) Trevisan","2657564","EXACT","100","ACCEPTED","SPECIES","Plantae","Rhodophyta","Florideophyceae","Ceramiales","Wrangeliaceae","Griffithsia","Griffithsia corallinoides"
,"Griffithsia devoniensis Harvey","Griffithsia devoniensis Harv.","2657590","EXACT","100","ACCEPTED","SPECIES","Plantae","Rhodophyta","Florideophyceae","Ceramiales","Wrangeliaceae","Griffithsia","Griffithsia devoniensis"
,"Gymnogongrus crenulatus (Turner) J.Agardh","Gymnogongrus crenulatus (Turner) J.Agardh, 1851","2667130","EXACT","100","ACCEPTED","SPECIES","Plantae","Rhodophyta","Florideophyceae","Gigartinales","Phyllophoraceae","Gymnogongrus","Gymnogongrus crenulatus"
,"Gymnogongrus griffithsiae (Turner) C.Martius","Gymnogongrus griffithsiae (Turner) Mart.","2667139","EXACT","100","ACCEPTED","SPECIES","Plantae","Rhodophyta","Florideophyceae","Gigartinales","Phyllophoraceae","Gymnogongrus","Gymnogongrus griffithsiae"
,"Gymnothamnion elegans (Schousboe ex C.Agardh) J.Agardh","Gymnothamnion elegans (Schousb. ex C.Agardh) J.Agardh","2658371","EXACT","100","ACCEPTED","SPECIES","Plantae","Rhodophyta","Florideophyceae","Ceramiales","Ceramiaceae","Gymnothamnion","Gymnothamnion elegans"
,"Halopteris filicina (Grateloup) Kutzing","Halopteris filicina (Gratel.) Kütz.","5423671","EXACT","100","ACCEPTED","SPECIES","Chromista","Ochrophyta","Phaeophyceae","Sphacelariales","Stypocaulaceae","Halopteris","Halopteris filicina"
,"Halopteris scoparia (Linnaeus) Sauvageau","Halopteris scoparia (L.) Sauv.","5423685","EXACT","100","ACCEPTED","SPECIES","Chromista","Ochrophyta","Phaeophyceae","Sphacelariales","Stypocaulaceae","Halopteris","Halopteris scoparia"
,"Halurus flosculosus (J.Ellis) Maggs & Hommersand","Halurus flosculosus (J.Ellis) Maggs & Hommers.","2658766","EXACT","100","ACCEPTED","SPECIES","Plantae","Rhodophyta","Florideophyceae","Ceramiales","Wrangeliaceae","Halurus","Halurus flosculosus"
,"Hydroclathrus tilesii (Endlicher) Santianez & M.J.Wynne","Hydroclathrus Bory de Saint-Vincent, 1825","3198483","HIGHERRANK","95","ACCEPTED","GENUS","Chromista","Ochrophyta","Phaeophyceae","Scytosiphonales","Scytosiphonaceae","Hydroclathrus",
,"Hypnea musciformis (Wulfen) J.V.Lamouroux","Hypnea musciformis","9802728","EXACT","99","ACCEPTED","SPECIES","Plantae","Rhodophyta","Florideophyceae","Gigartinales","Cystocloniaceae","Hypnea","Hypnea musciformis"
,"Hypoglossum hypoglossoides (Stackhouse) Collins & Hervey","Hypoglossum hypoglossoides (Stackhouse) F.S.Collins & Hervey","2661577","EXACT","100","ACCEPTED","SPECIES","Plantae","Rhodophyta","Florideophyceae","Ceramiales","Delesseriaceae","Hypoglossum","Hypoglossum hypoglossoides"
,"Jania capillacea Harvey","Jania capillacea Harv.","5276161","EXACT","100","ACCEPTED","SPECIES","Plantae","Rhodophyta","Florideophyceae","Corallinales","Corallinaceae","Jania","Jania capillacea"
,"Jania crassa J.V.Lamouroux","Jania crassa J.V.Lamour.","5276190","EXACT","100","ACCEPTED","SPECIES","Plantae","Rhodophyta","Florideophyceae","Corallinales","Corallinaceae","Jania","Jania crassa"
,"Jania longifurca Zanardini","Jania longifurca Zanardini, 1844","5276157","EXACT","100","ACCEPTED","SPECIES","Plantae","Rhodophyta","Florideophyceae","Corallinales","Corallinaceae","Jania","Jania longifurca"
,"Jania rubens (Linnaeus) J.V.Lamouroux","Jania rubens (Linnaeus) J.V.Lamouroux","5276203","EXACT","100","ACCEPTED","SPECIES","Plantae","Rhodophyta","Florideophyceae","Corallinales","Corallinaceae","Jania","Jania rubens"
,"Jania virgata (Zanardini) Montagne","Jania virgata (Zanardini) Mont., 1846","5276147","EXACT","100","ACCEPTED","SPECIES","Plantae","Rhodophyta","Florideophyceae","Corallinales","Corallinaceae","Jania","Jania virgata"
,"Kallymenia reniformis (Turner) J.G.Agardh","Kallymenia reniformis (Turner) J.G.Agardh","2666738","EXACT","100","ACCEPTED","SPECIES","Plantae","Rhodophyta","Florideophyceae","Gigartinales","Kallymeniaceae","Kallymenia","Kallymenia reniformis"
,"Laurencia obtusa (Huds.) J.V.Lamouroux","Laurencia obtusa (Huds.) J.V.Lamour.","2661137","EXACT","100","SYNONYM","SPECIES","Plantae","Rhodophyta","Florideophyceae","Ceramiales","Rhodomelaceae","Laurencia","Laurencia dendroidea"
,"Laurencia viridis Gil-Rodriguez & Haroun","Laurencia viridis","2660968","EXACT","99","ACCEPTED","SPECIES","Plantae","Rhodophyta","Florideophyceae","Ceramiales","Rhodomelaceae","Laurencia","Laurencia viridis"
,"Laurenciella marilzae (Gil-Rodriguez","Laurenciella marilzae (Gil-Rodríguez et al.) Gil-Rodríguez et al.","7605242","EXACT","96","ACCEPTED","SPECIES","Plantae","Rhodophyta","Florideophyceae","Ceramiales","Rhodomelaceae","Laurenciella","Laurenciella marilzae"
,"Leathesia marina (Lyngbye) Decaisne","Leathesia marina (Lyngb.) Decne.","7627628","EXACT","100","ACCEPTED","SPECIES","Chromista","Ochrophyta","Phaeophyceae","Ectocarpales","Chordariaceae","Leathesia","Leathesia marina"
,"Leptosiphonia fibrillosa (Agardh) A.M.Savoie & G.W.Saunders","Leptosiphonia Kylin, 1956","2660186","HIGHERRANK","96","ACCEPTED","GENUS","Plantae","Rhodophyta","Florideophyceae","Ceramiales","Rhodomelaceae","Leptosiphonia",
,"Lobophora variegata (J.V.Lamouroux) Womersley ex E.C.Oliveira","Lobophora variegata (J.V.Lamour.) Womersley ex E.C.Oliveira","3200482","EXACT","100","ACCEPTED","SPECIES","Chromista","Ochrophyta","Phaeophyceae","Dictyotales","Dictyotaceae","Lobophora","Lobophora variegata"
,"Lomentaria articulata (Hudson) Lyngbye","Lomentaria articulata (Huds.) Lyngb.","2663537","EXACT","100","ACCEPTED","SPECIES","Plantae","Rhodophyta","Florideophyceae","Rhodymeniales","Lomentariaceae","Lomentaria","Lomentaria articulata"
,"Lychaete pellucida (Hudson) M.J.Wynne","Lychaete J.Agardh, 1846","2644499","HIGHERRANK","94","DOUBTFUL","GENUS","Plantae","Chlorophyta","Ulvophyceae","Cladophorales","Cladophoraceae","Lychaete",
,"Mesophyllum expansum (Philippi) Cabioch & M.L.Mendoza","Mesophyllum expansum (Philippi) Cabioch & M.L.Mendoza, 2003","5275941","EXACT","100","ACCEPTED","SPECIES","Plantae","Rhodophyta","Florideophyceae","Corallinales","Hapalidiaceae","Mesophyllum","Mesophyllum expansum"
,"Microdictyon umbilicatum (Velley) Zanardini","Microdictyon umbilicatum (Velley) Zanardini","5272975","EXACT","100","ACCEPTED","SPECIES","Plantae","Chlorophyta","Ulvophyceae","Cladophorales","Anadyomenaceae","Microdictyon","Microdictyon umbilicatum"
,"Millerella tinerfensis (Seoane-Camba) S.M.Boo & J.M.Rico","Millerella G.H.Boo & S.M.Boo, 2016","10092748","HIGHERRANK","96","ACCEPTED","GENUS","Plantae","Rhodophyta","Florideophyceae","Gelidiales","Gelidiellaceae","Millerella",
,"Myrionema strangulans Greville","Myrionema strangulans Grev.","5423151","EXACT","100","ACCEPTED","SPECIES","Chromista","Ochrophyta","Phaeophyceae","Ectocarpales","Chordariaceae","Myrionema","Myrionema strangulans"
,"Nemalion elminthoides (Velley) Batters","Nemalion elminthoides (Velley) Batters","7658841","EXACT","100","SYNONYM","SPECIES","Plantae","Rhodophyta","Florideophyceae","Nemaliales","Liagoraceae","Nemalion","Nemalion multifidum"
,"Neoizziella divaricata (C.K.Tseng) S.-M.Lin","Neoizziella divaricata (C.K.Tseng) S.M.Lin, S.-Y.Yang & Huisman, 2011","8291154","EXACT","100","ACCEPTED","SPECIES","Plantae","Rhodophyta","Florideophyceae","Nemaliales","Liagoraceae","Neoizziella","Neoizziella divaricata"
,"Osmundea hybrida (A.P.de Candolle) K.W.Nam","Osmundea hybrida (DC.) K.W.Nam","2659413","EXACT","100","ACCEPTED","SPECIES","Plantae","Rhodophyta","Florideophyceae","Ceramiales","Rhodomelaceae","Osmundea","Osmundea hybrida"
,"Osmundea pinnatifida (Hudson) Stackhouse","Osmundea pinnatifida (Huds.) Stackh.","2659421","EXACT","100","SYNONYM","SPECIES","Plantae","Rhodophyta","Florideophyceae","Ceramiales","Rhodomelaceae","Osmundea","Osmundea ramosissima"
,"Padina pavonica (Linnaeus) Thivy","Padina pavonica (L.) Thivy","3200186","EXACT","100","ACCEPTED","SPECIES","Chromista","Ochrophyta","Phaeophyceae","Dictyotales","Dictyotaceae","Padina","Padina pavonica"
,"Padina pavonica (Linnaeus) Thivy","Padina pavonica (L.) Thivy","3200186","EXACT","100","ACCEPTED","SPECIES","Chromista","Ochrophyta","Phaeophyceae","Dictyotales","Dictyotaceae","Padina","Padina pavonica"
,"Papenfussiella kuromo (Yendo) Inagaki","Papenfussiella Kylin, 1940","3199329","HIGHERRANK","96","ACCEPTED","GENUS","Chromista","Ochrophyta","Phaeophyceae","Ectocarpales","Chordariaceae","Papenfussiella",
,"Petrospongium berkeleyi (Greville) Nageli ex Kutzing","Petrospongium berkeleyi","3199152","EXACT","99","SYNONYM","SPECIES","Chromista","Ochrophyta","Phaeophyceae","Ectocarpales","Chordariaceae","Cylindrocarpus","Cylindrocarpus berkeleyi"
,"Peyssonnelia squamaria (S.G.Gmelin) Decaisne ex J.Agardh","Peyssonnelia squamaria (S.G.Gmelin) Decaisne","2667893","EXACT","92","ACCEPTED","SPECIES","Plantae","Rhodophyta","Florideophyceae","Peyssonneliales","Peyssonneliaceae","Peyssonnelia","Peyssonnelia squamaria"
,"Phyllophora crispa (Hudson) P.S.Dixon","Phyllophora crispa (Hudson) P.S.Dixon","5279442","EXACT","100","ACCEPTED","SPECIES","Plantae","Rhodophyta","Florideophyceae","Gigartinales","Phyllophoraceae","Phyllophora","Phyllophora crispa"
,"Platoma cyclocolpum (Montagne) F.Schmitz","Platoma cyclocolpum (Mont.) F.Schmitz","4375846","EXACT","100","ACCEPTED","SPECIES","Plantae","Rhodophyta","Florideophyceae","Nemastomatales","Schizymeniaceae","Platoma","Platoma cyclocolpum"
,"Plocamium cartilagineum (Linnaeus) P.S.Dixon","Plocamium cartilagineum (Linnaeus) P.S.Dixon","5278595","EXACT","100","ACCEPTED","SPECIES","Plantae","Rhodophyta","Florideophyceae","Plocamiales","Plocamiaceae","Plocamium","Plocamium cartilagineum"
,"Polysiphonia opaca (C.Agardh) Moris & De Notaris","Polysiphonia opaca (C.Agardh) Moris & De Not., 1839","5277953","EXACT","100","ACCEPTED","SPECIES","Plantae","Rhodophyta","Florideophyceae","Ceramiales","Rhodomelaceae","Polysiphonia","Polysiphonia opaca"
,"Polysiphonia stricta (Dillwyn) Greville","Polysiphonia stricta (Dillwyn) Greville","5277926","EXACT","100","ACCEPTED","SPECIES","Plantae","Rhodophyta","Florideophyceae","Ceramiales","Rhodomelaceae","Polysiphonia","Polysiphonia stricta"
,"Pterocladiella capillacea (S.G.Gmelin) Santelices & Hommersand","Pterocladiella capillacea (S.G.Gmelin) Santel. & Hommers.","2662919","EXACT","100","ACCEPTED","SPECIES","Plantae","Rhodophyta","Florideophyceae","Gelidiales","Pterocladiaceae","Pterocladiella","Pterocladiella capillacea"
,"Rhodymenia holmesii Ardissone","Rhodymenia holmesii Ardiss.","2663356","EXACT","100","ACCEPTED","SPECIES","Plantae","Rhodophyta","Florideophyceae","Rhodymeniales","Rhodymeniaceae","Rhodymenia","Rhodymenia holmesii"
,"Sargassum furcatum Kutzing","Sargassum furcatum Kütz.","3197176","EXACT","100","ACCEPTED","SPECIES","Chromista","Ochrophyta","Phaeophyceae","Fucales","Sargassaceae","Sargassum","Sargassum furcatum"
,"Sargassum vulgare C.Agardh","Sargassum vulgare C.Agardh","3197125","EXACT","100","ACCEPTED","SPECIES","Chromista","Ochrophyta","Phaeophyceae","Fucales","Sargassaceae","Sargassum","Sargassum vulgare"
,"Schimmelmannia schousboei (J.Agardh) J.Agardh","Schimmelmannia schousboei (Agardh) Agardh","2666899","EXACT","100","ACCEPTED","SPECIES","Plantae","Rhodophyta","Florideophyceae","Acrosymphytales","Acrosymphytaceae","Schimmelmannia","Schimmelmannia schousboei"
,"Schizymenia apoda (J.Agardh) J.Agardh","Schizymenia apoda","2665954","EXACT","100","ACCEPTED","SPECIES","Plantae","Rhodophyta","Florideophyceae","Nemastomatales","Schizymeniaceae","Schizymenia","Schizymenia apoda"
,"Schottera nicaeensis (J.V.Lamouroux ex Duby) Guiry & Hollenberg","Schottera nicaeensis (Duby) Guiry & Hollenb.","4278213","EXACT","100","ACCEPTED","SPECIES","Plantae","Rhodophyta","Florideophyceae","Gigartinales","Phyllophoraceae","Schottera","Schottera nicaeensis"
,"Sphacelaria cirrosa (Roth) C.Agardh","Sphacelaria cirrosa (Roth) C.Agardh","3200617","EXACT","100","ACCEPTED","SPECIES","Chromista","Ochrophyta","Phaeophyceae","Sphacelariales","Sphacelariaceae","Sphacelaria","Sphacelaria cirrosa"
,"Sphaerococcus coronopifolius Stackhouse","Sphaerococcus coronopifolius Stackhouse","5279276","EXACT","100","ACCEPTED","SPECIES","Plantae","Rhodophyta","Florideophyceae","Gigartinales","Sphaerococcaceae","Sphaerococcus","Sphaerococcus coronopifolius"
,"Spyridia filamentosa (Wulfen) Harvey","Spyridia filamentosa (Wulfen) Harv.","2657164","EXACT","100","ACCEPTED","SPECIES","Plantae","Rhodophyta","Florideophyceae","Ceramiales","Spyridiaceae","Spyridia","Spyridia filamentosa"
,"Stenogramma interruptum (C.Agardh) Montagne","Stenogramma interruptum (C.Agardh) Mont.","7588411","EXACT","100","SYNONYM","SPECIES","Plantae","Rhodophyta","Florideophyceae","Gigartinales","Phyllophoraceae","Stenogramme","Stenogramme interrupta"
,"Symphyocladia marchantioides (Harvey) Falkenberg","Symphyocladia marchantioides (Harvey) Falkenberg, 1897","2661325","EXACT","100","SYNONYM","SPECIES","Plantae","Rhodophyta","Florideophyceae","Ceramiales","Rhodomelaceae","Placophora","Placophora marchantioides"
,"Taenioma nanum (Kutzing) Papenfuss","Taenioma nanum (Kütz.) Papenf.","5278204","EXACT","100","ACCEPTED","SPECIES","Plantae","Rhodophyta","Florideophyceae","Ceramiales","Delesseriaceae","Taenioma","Taenioma nanum"
,"Taonia atomaria (Woodward) J.Agardh","Taonia atomaria (Woodw.) J.Agardh","3200436","EXACT","100","ACCEPTED","SPECIES","Chromista","Ochrophyta","Phaeophyceae","Dictyotales","Dictyotaceae","Taonia","Taonia atomaria"
,"Tenarea tortuosa (Esper) Me.Lemoine","Tenarea tortuosa (Esper) M.Lemoine, 1910","2655628","EXACT","100","SYNONYM","SPECIES","Plantae","Rhodophyta","Florideophyceae","Corallinales","Corallinaceae","Lithophyllum","Lithophyllum tortuosum"
,"Ulva clathrata (Roth) C.Agardh","Ulva clathrata (Roth) C.Agardh","9402904","EXACT","100","ACCEPTED","SPECIES","Plantae","Chlorophyta","Ulvophyceae","Ulvales","Ulvaceae","Ulva","Ulva clathrata"
,"Ulva intestinalis Linnaeus","Ulva intestinalis L.","5273394","EXACT","100","ACCEPTED","SPECIES","Plantae","Chlorophyta","Ulvophyceae","Ulvales","Ulvaceae","Ulva","Ulva intestinalis"
,"Ulva rigida C.Agardh","Ulva rigida C.Agardh","5273416","EXACT","100","ACCEPTED","SPECIES","Plantae","Chlorophyta","Ulvophyceae","Ulvales","Ulvaceae","Ulva","Ulva rigida"
,"Valonia utricularis (Roth) C.Agardh","Valonia utricularis (Roth) C.Agardh","5273060","EXACT","100","ACCEPTED","SPECIES","Plantae","Chlorophyta","Ulvophyceae","Siphonocladales","Valoniaceae","Valonia","Valonia utricularis"
,"Vertebrata fruticulosa (Wulfen) Kuntze","Vertebrata fruticulosa (Wulfen) Kuntze, 1891","7549632","EXACT","100","ACCEPTED","SPECIES","Plantae","Rhodophyta","Florideophyceae","Ceramiales","Rhodomelaceae","Vertebrata","Vertebrata fruticulosa"
,"Vertebrata fucoides (Hudson) Kuntze","Vertebrata fucoides (Huds.) Kuntze","8074783","EXACT","100","SYNONYM","SPECIES","Plantae","Rhodophyta","Florideophyceae","Ceramiales","Rhodomelaceae","Polysiphonia","Polysiphonia fucoides"
,"Vertebrata thuyoides (Harvey) Kuntze","Vertebrata thuyoides (Harvey) Kuntze, 1891","7431605","EXACT","100","ACCEPTED","SPECIES","Plantae","Rhodophyta","Florideophyceae","Ceramiales","Rhodomelaceae","Vertebrata","Vertebrata thuyoides"
,"Zanardinia typus (Nardo) P.C.Silva","Zanardinia typus (Nardo) P.C.Silva, 2000","8389576","EXACT","100","ACCEPTED","SPECIES","Chromista","Ochrophyta","Phaeophyceae","Cutleriales","Cutleriaceae","Zanardinia","Zanardinia typus"
,"Zonaria tournefortii (J.V.Lamouroux) Montagne","Zonaria tournefortii (J.V.Lamour.) Mont.","7777828","EXACT","100","ACCEPTED","SPECIES","Chromista","Ochrophyta","Phaeophyceae","Dictyotales","Dictyotaceae","Zonaria","Zonaria tournefortii"
